# Supplementary material for: Review on Cardiorespiratory Complications after SARS-CoV-2 Infection in Young Adult Healthy Athletes
Source: MDPI journal article supplement (doi:10.3390/ijerph19095680), 2022-05-06
Supplement: s1 [file s1]

**Search query:**

1) Pubmed

Search: (sport\*[Title] OR athlet\*[Title]) AND ("SARS-CoV-2"[Title] OR "COVID-19"[Title]) AND (\*cardi\*[Title] OR respirat\*[Title]) Filters: English, from 2020 - 2021

2) Scopus

TITLE ( ( sport\* OR athlet\* ) AND ( {SARS-CoV-2} OR {COVID-19} ) AND ( \*cardi\* OR respirat\* ) ) AND ( LIMIT-TO ( PUBYEAR , 2021 ) OR LIMIT-TO ( PUBYEAR , 2020 ) ) AND ( LIMIT-TO ( LANGUAGE , "English" ) )

3) Web of Science

TI=((sports\* OR athlet\*) AND ("SARS-CoV-2" OR "COVID-19")) AND ( \*cardi\* OR respirat\* ) and 2021 or 2020 (Publication Years) and English (Languages)

4) World Health Organization

ti:((sport\* OR athlet\*) AND (\*cardi\* OR respirat\*)) AND la:("en") AND year\_cluster:("2021" OR "2020")
