# Supplementary material for: Review on Cardiorespiratory Complications after SARS-CoV-2 Infection in Young Adult Healthy Athletes
Source: MDPI journal article supplement (doi:10.3390/ijerph19095680), 2022-05-06
Supplement: s1 [file s1]

**Table S1.** Quality appraisal of cross-sectional studies according to the Joanna Briggs Institute Critical Appraisal tools checklists (Y=Yes, N=No, U=Unclear, NA=Not Applicable).

|                                                                          | [16]     |          |          |          | [20]     |          |          |          | [24]     |          |          |          |
|--------------------------------------------------------------------------|----------|----------|----------|----------|----------|----------|----------|----------|----------|----------|----------|----------|
|                                                                          | Y        | N        | U        | NA       | Y        | N        | U        | NA       | Y        | N        | U        | NA       |
| Were the criteria for inclusion in the sample clearly defined?           | X        |          |          |          | X        |          |          |          | X        |          |          |          |
| Were the study subjects and the setting described in detail?             |          | X        |          |          | X        |          |          |          | X        |          |          |          |
| Was the exposure measured in a valid and reliable way                    | X        |          |          |          | X        |          |          |          | X        |          |          |          |
| Were objective, standard criteria used for measurement of the condition? | X        |          |          |          |          | X        |          |          | X        |          |          |          |
| Were confounding factors identified?                                     |          | X        |          |          |          | X        |          |          |          | X        |          |          |
| Were strategies to deal with confounding factors stated?                 |          | X        |          |          |          | X        |          |          |          | X        |          |          |
| Were the outcomes measured in a valid and reliable way?                  | X        |          |          |          | X        |          |          |          | X        |          |          |          |
| Was appropriate statistical analysis used?                               |          | X        |          |          | X        |          |          |          |          | X        |          |          |
| <b>Total Answer</b>                                                      | <b>4</b> | <b>4</b> | <b>0</b> | <b>0</b> | <b>5</b> | <b>3</b> | <b>0</b> | <b>0</b> | <b>5</b> | <b>3</b> | <b>0</b> | <b>0</b> |

**Table S2.** Quality appraisal of case series study according to the Joanna Briggs Institute Critical Appraisal tools checklists (Y=Yes, N=No, U=Unclear, NA=Not Applicable).

|                                                                                                               | [21] |   |   |    |
|---------------------------------------------------------------------------------------------------------------|------|---|---|----|
|                                                                                                               | Y    | N | U | NA |
| Were there clear criteria for inclusion in the case series?                                                   |      | X |   |    |
| Was the condition measured in a standard, reliable way for all participants included in the case series?      | X    |   |   |    |
| Were valid methods used for identification of the condition for all participants included in the case series? | X    |   |   |    |
| Did the case series have consecutive inclusion of participants?                                               | X    |   |   |    |
| Did the case series have complete inclusion of participants?                                                  | X    |   |   |    |
| Was there clear reporting of the demographics of the participants in the study?                               |      | X |   |    |
| Was there clear reporting of clinical information of the participants?                                        |      | X |   |    |
| Were the outcomes or follow up results of cases clearly reported?                                             | X    |   |   |    |
| Was there clear reporting of the presenting site(s)/clinic(s) demographic information?                        |      | X |   |    |
| Was statistical analysis appropriate?                                                                         | X    |   |   |    |
| Total Answer                                                                                                  | 6    | 4 | 0 | 0  |

**Table S3.** Quality appraisal of cohort studies according to the Joanna Briggs Institute Critical Appraisal tools checklists (Y=Yes, N=No, U=Unclear, NA=Not Applicable).

|                                                                                                            | [15] |   |   |    | [17] |   |   |    | [18] |   |   |    | [19] |   |   |    | [22] |   |   |    | [23] |   |   |    | [25] |   |   |    | [26] |   |   |    | [27] |   |   |    | [28] |   |   |    | [29] |   |   |   |
|------------------------------------------------------------------------------------------------------------|------|---|---|----|------|---|---|----|------|---|---|----|------|---|---|----|------|---|---|----|------|---|---|----|------|---|---|----|------|---|---|----|------|---|---|----|------|---|---|----|------|---|---|---|
|                                                                                                            | Y    | N | U | NA |      |   |   |   |
| Were the two groups similar and recruited from the same population?                                        |      |   |   | X  |      |   |   | X  |      |   |   | X  | X    |   |   | X  |      |   |   | X  | X    |   |   |    |      | X | X |    |      |   | X |    |      |   | X |    |      |   | X |    |      |   |   |   |
| Were the exposures measured similarly to assign people to both exposed and unexposed groups?               |      |   |   | X  |      |   |   | X  |      |   |   | X  |      | X |   |    | X    |   |   |    | X    | X |   |    |      |   | X |    | X    |   |   |    | X    |   |   |    | X    |   |   |    | X    |   |   |   |
| Was the exposure measured in a valid and reliable way?                                                     | X    |   |   |    | X    |   |   |    | X    |   |   |    | X    |   |   |    | X    |   |   |    | X    |   |   |    | X    |   |   |    | X    |   |   |    | X    |   |   |    | X    |   |   |    | X    |   |   |   |
| Were confounding factors identified?                                                                       |      | X |   |    |      | X |   |    |      | X |   |    |      | X |   |    |      | X |   |    |      | X |   |    |      | X |   |    |      | X |   |    |      |   | X |    |      |   | X |    |      |   |   |   |
| Were strategies to deal with confounding factors stated?                                                   |      | X |   |    |      | X |   |    |      | X |   |    |      | X |   |    |      | X |   |    |      | X |   |    |      | X |   |    |      | X |   |    |      |   | X |    |      |   | X |    |      |   |   |   |
| Were the groups/participants free of the outcome at the start of the study (or at the moment of exposure)? | X    |   |   |    |      |   |   | X  |      |   |   | X  |      |   |   |    |      | X |   |    |      | X |   |    |      |   | X |    | X    |   |   |    |      | X |   |    |      | X |   |    |      |   |   |   |
| Were the outcomes measured in a valid and reliable way?                                                    | X    |   |   |    | X    |   |   |    | X    |   |   |    | X    |   |   |    | X    |   |   |    | X    |   |   |    | X    |   |   |    | X    |   |   |    |      | X |   |    |      | X |   |    |      |   |   |   |
| Was the follow up time reported and sufficient to be long enough for outcomes to occur?                    |      | X |   |    | X    |   |   |    |      | X |   |    |      | X |   |    |      | X |   |    |      | X |   |    |      | X |   |    |      | X |   |    |      |   | X |    |      |   | X |    |      |   |   |   |
| Was follow up complete, and if not, were the reasons to loss to follow up described and explored?          |      | X |   |    |      | X |   |    |      | X |   |    |      | X |   |    |      | X |   |    |      | X |   |    |      | X |   |    |      | X |   |    |      |   | X |    |      |   | X |    |      |   |   |   |
| Were strategies to address incomplete follow up utilized?                                                  |      | X |   |    |      | X |   |    |      | X |   |    |      | X |   |    |      | X |   |    |      | X |   |    |      | X |   |    |      | X |   |    |      |   | X |    |      |   | X |    |      |   |   |   |
| Was appropriate statistical analysis used?                                                                 | X    |   |   |    | X    |   |   |    | X    |   |   |    | X    |   |   |    | X    |   |   |    | X    |   |   |    | X    |   |   |    | X    |   |   |    |      | X |   |    |      | X |   |    |      |   |   |   |
| Total Answer                                                                                               | 4    | 5 | 0 | 2  | 5    | 3 | 1 | 2  | 4    | 4 | 1 | 2  | 5    | 6 | 0 | 0  | 3    | 7 | 1 | 0  | 2    | 6 | 1 | 2  | 6    | 5 | 0 | 0  | 5    | 3 | 1 | 2  | 5    | 6 | 0 | 0  | 5    | 6 | 0 | 0  | 7    | 4 | 0 | 0 |
